# Supplementary material
Source: publisher figshare collection journal article supplement (https://acs.figshare.com/ndownloader/files/4173304)
Supplement: Supplementary file 1 [file 4173304]

## Supplementary Information

### **Pd nanowires as new biosensing materials for magnified fluorescent detection of nucleic acid**

Libing Zhang,<sup>1</sup> Shaojun Guo,<sup>1</sup> Shaojun Dong, and Erkang Wang\*

State Key Laboratory of Electroanalytical Chemistry, Changchun Institute of Applied Chemistry,  
Chinese Academy of Sciences, Changchun, Jilin, 130022, P. R. China; <sup>‡</sup> Graduate School of the  
Chinese Academy of Sciences, Beijing, 100039, P. R. China.

\* Corresponding author: Prof. Erkang Wang, Fax: +86-431-85689711, Tel: +86-431-85262003,  
Email: ekwang@ciac.jl.cn

### Supplementary Figures

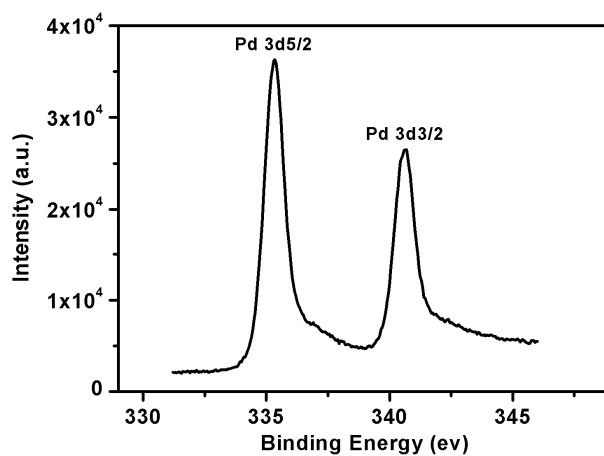

**Figure S1** XPS spectroscopy of Pd nanowires.

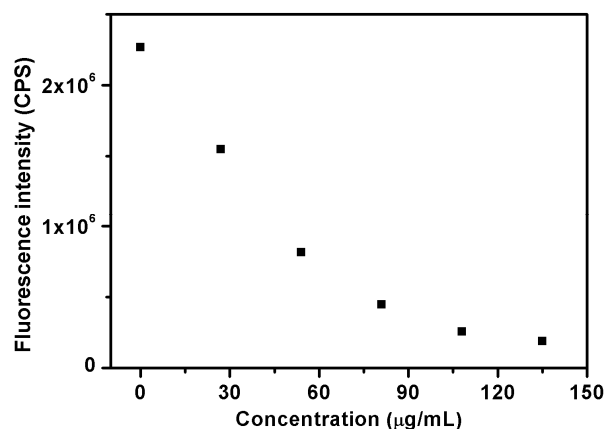

**Figure S2** The relationship between the fluorescence intensity of P1 (20 nM) and the concentration of Pd NWs.

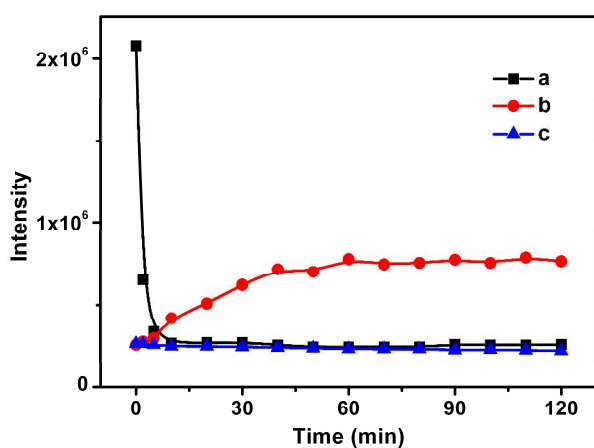

**Figure S3** (a) Fluorescence quenching of P1 (20 nM) by Pd NWs, (b) fluorescence recovery of P1-Pd by T1 (1.0 μM) and (c) fluorescence signal of P1-Pd in the absence of T1 as a function of incubation time.

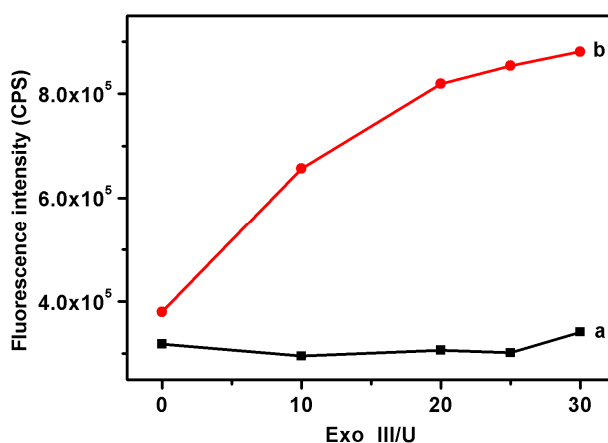

**Figure S4** Fluorescent intensity at 520 nm with different amounts of Exo III; curve a: 0 nM target DNA present, curve b: 100 nM target DNA present.

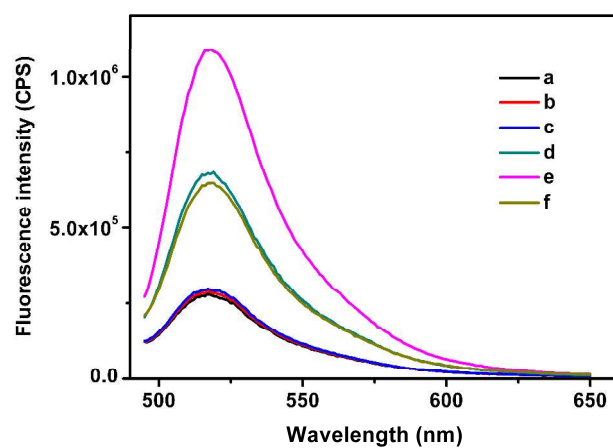

**Figure S5** Fluorescence emission spectra of P1 (20 nM) at different conditions: (a) P1 Pd NWs; (b) P1 + Pd NWs + 20 U Exo III; (c) P1 + Pd NWs + 20 U Exo III (heat deactivated); (d) P1 + Pd NWs + 1.0  $\mu$ M T1 ; (e) P1 + Pd NWs + 1.0  $\mu$ M T1 + 20 U Exo III; (f) P1 + Pd NWs + 1.0  $\mu$ M T1 + 20 U Exo III (heat deactivated).
